# Supplementary material for: The impact of induced stress on reactive and proactive control in depression
Source: PeerJ. 2025 Jan 13;13:e18821. doi: 10.7717/peerj.18821 (PMC11737340; doi:10.7717/peerj.18821)
Supplement: Supplemental Information 1 [file peerj-13-18821-s001.xlsx]

## Sheet: Sheet1
ID	Age	Sex	Condition	BDI	BDI_Group	CO_AX	CO_Othr	RT_CPT1_AX	RT_CPT1_AY	RT_CPT1_BX	RT_CPT1_BY	ER_CPT1_AX	ER_CPT1_AY	ER_CPT1_BX	ER_CPT1_BY	VAS1_stress	VAS1_mood	VAS1_fatigue	VAS2_stress	VAS2_mood	VAS2_fatigue	RT_CPT2_AX	RT_CPT2_AY	RT_CPT2_BX	RT_CPT2_BY	ER_CPT2_AX	ER_CPT2_AY	ER_CPT2_BX	ER_CPT2_BY	Crrct_1ER_AX	Crrct_1ER_AY	Crrct_1ER_BX	Crrct_1ER_BY	Crrct_2ER_AX	Crrct_2ER_AY	Crrct_2ER_BX	Crrct_2ER_BY	Z_1ER_AX	Z_1ER_AY	Z_1ER_BX	Z_1ER_BY	Z_2ER_AX	Z_2ER_AY	Z_2ER_BX	Z_2ER_BY	dcntxt1	dcntxt2	PBI_ER_1	PBI_ER_2
1	31	male	0	0	0	0	0	0.599704	0.658843	0.449286	0.613489	0.242857	0.3	0.3	0.1	0.639005	0.477585	0.776946	0.650745	0.46878	0.483454	0.384146	0.345513	0.473856	0.462625	0.0857143	0.2	0.1	0.2	0.242857	0.3	0.3	0.1	0.0857143	0.2	0.1	0.2	-0.697141	-0.524401	-0.524401	-1.28155	-1.36763	-0.841621	-1.28155	-0.841621	1.22154	2.64918	0	0.333333
2	36	male	0	12	0	0	0	0.453571	0.602657	0.405111	0.416033	0.0571429	0.3	0.1	0.1	1.31	0.929935	1.36344	1.17341	1.10809	1.62177	0.420472	0.662863	0.32659	0.38948	0.0142857	0.2	0	0	0.0571429	0.3	0.1	0.1	0.0142857	0.2	0.0333333	0.0333333	-1.57922	-0.524401	-1.28155	-1.28155	-2.18935	-0.841621	-1.83391	-1.83391	2.86077	4.02326	0.5	0.714286
3	24	male	0	0	0	0	0	0.507623	0.644475	0.406244	0.44887	0.0714286	0.6	0.1	0	1.99458	1.33454	1.63291	1.92224	1.57866	1.8921	0.486541	0.5873	0.399362	0.37776	0	0.6	0.2	0	0.0714286	0.6	0.1	0.0333333	0.0047619	0.6	0.2	0.0333333	-1.46523	0.253347	-1.28155	-1.83391	-2.59266	0.253347	-0.841621	-1.83391	2.74679	3.43428	0.714286	0.5
4	30	male	0	6	0	0	0	0.352691	0.479775	0.33413	0.32321	0.0142857	0.2	0	0	1.26432	1.03839	1.33781	1.31604	1.11189	1.34598	0.34445	0.476289	0.27024	0.2911	0.0285714	0.1	0	0	0.0142857	0.2	0.0333333	0.0333333	0.0285714	0.1	0.0333333	0.0333333	-2.18935	-0.841621	-1.83391	-1.83391	-1.90222	-1.28155	-1.83391	-1.83391	4.02326	3.73613	0.714286	0.5
5	45	female	0	0	0	0	0	0.471312	0.568489	0.54915	0.54435	0.0142857	0.1	0.2	0	0.0409806	0.0134048	0.0103409	0.132899	0.0195327	0.0164688	0.461907	0.62766	0.559467	0.45243	0.0428571	0	0.1	0	0.0142857	0.1	0.2	0.0333333	0.0428571	0.0333333	0.1	0.0333333	-2.18935	-1.28155	-0.841621	-1.83391	-1.71845	-1.83391	-1.28155	-1.83391	3.03097	3	-0.333333	-0.5
6	41	male	0	0	0	0	0	0.417266	0.591271	0.33031	0.461187	0.0857143	0.3	0	0.2	1.99431	1.99131	1.98233	1.12878	0	1.24259	0.375251	0.5945	0.34832	0.420122	0.0285714	0.7	0	0.1	0.0857143	0.3	0.0333333	0.2	0.0285714	0.7	0.0333333	0.1	-1.36763	-0.524401	-1.83391	-0.841621	-1.90222	0.524401	-1.83391	-1.28155	3.20154	3.73613	0.8	0.909091
7	54	female	0	6	0	0	0	0.647	0.69873	0.607533	0.59382	0.114286	0	0.7	0	1.16609	0.992091	1.81859	1.15818	1.13841	1.53386	0.576626	0.6254	0.547122	0.50075	0.0571429	0.1	0.1	0	0.114286	0.0333333	0.7	0.0333333	0.0571429	0.1	0.1	0.0333333	-1.20405	-1.83391	0.524401	-1.83391	-1.57922	-1.28155	-1.28155	-1.83391	0.679646	2.86077	-0.909091	0
8	43	male	0	1	0	0	0	0.4397	0.623429	0.3915	0.4906	0	0.3	0.2	0	0.993727	0.658146	1.31363	0.137525	0.422926	0.096754	0.3884	0.5916	0.424	0.3592	0	0	0.1	0	0.0047619	0.3	0.2	0.0333333	0.0047619	0.0333333	0.1	0.0333333	-2.59266	-0.524401	-0.841621	-1.83391	-2.59266	-1.83391	-1.28155	-1.83391	3.43428	3.87421	0.2	-0.5
9	40	female	0	4	0	0	0	0.430816	0.522637	0.535589	0.47232	0.114286	0.2	0.1	0	1.27681	0.999077	1.1598	0.998715	0.997591	1.0544	0.451993	0.590014	0.48881	0.44506	0.128571	0.3	0	0	0.114286	0.2	0.1	0.0333333	0.128571	0.3	0.0333333	0.0333333	-1.20405	-0.841621	-1.28155	-1.83391	-1.13317	-0.524401	-1.83391	-1.83391	2.4856	2.96708	0.333333	0.8
10	43	female	0	1	0	0	0	0.469044	0.58415	0.50625	0.46911	0.0571429	0	0	0	1	0.791259	0.93042	0.921722	0.521635	0	0.447294	0.612688	0.35936	0.36814	0.0142857	0.2	0	0	0.0571429	0.0333333	0.0333333	0.0333333	0.0142857	0.2	0.0333333	0.0333333	-1.57922	-1.83391	-1.83391	-1.83391	-2.18935	-0.841621	-1.83391	-1.83391	3.41313	4.02326	0	0.714286
11	39	male	0	12	0	0	0	0.441603	0.50205	0.37425	0.41069	0	0	0	0	0.43284	0.856685	1.08538	1.23479	0.600549	1.2165	0.288351	0.279687	0.27085	0.27762	0	0.2	0	0	0.0047619	0.0333333	0.0333333	0.0333333	0.0047619	0.2	0.0333333	0.0333333	-2.59266	-1.83391	-1.83391	-1.83391	-2.59266	-0.841621	-1.83391	-1.83391	4.42657	4.42657	0	0.714286
12	32	female	0	9	0	0	0	0.650727	0.6525	0.517867	0.58915	0.0857143	0.1	0.4	0	1.83307	1.31863	1.77041	1.70446	0.922917	1.48352	0.376541	0.390586	0.5066	0.47281	0.0714286	0.3	0.1	0	0.0857143	0.1	0.4	0.0333333	0.0714286	0.3	0.1	0.0333333	-1.36763	-1.28155	-0.253347	-1.83391	-1.46523	-0.524401	-1.28155	-1.83391	1.62098	2.74679	-0.6	0.5
13	42	male	0	2	0	0	0	0.559937	0.677556	0.686857	0.6501	0.1	0.1	0.3	0	0.935939	0.867606	1.07687	0.564382	0.235533	0.820628	0.509101	0.7085	0.5535	0.6411	0.0142857	0	0.6	0	0.1	0.1	0.3	0.0333333	0.0142857	0.0333333	0.6	0.0333333	-1.28155	-1.28155	-0.524401	-1.83391	-2.18935	-1.83391	0.253347	-1.83391	1.80595	1.936	-0.5	-0.894737
14	28	female	0	8	0	0	1	0.570698	0.622529	0.6077	0.540811	0.0857143	0.4	0.2	0	1.20614	0.987874	1.82759	1.61538	1.14248	2	0.544329	0.68805	0.566533	0.553778	0.2	0.8	0.4	0.1	0.0857143	0.4	0.2	0.0333333	0.2	0.8	0.4	0.1	-1.36763	-0.253347	-0.841621	-1.83391	-0.841621	0.841621	-0.253347	-1.28155	2.20925	1.09497	0.333333	0.333333
15	57	female	0	6	0	0	0	0.546372	0.664511	0.497067	0.516378	0.0714286	0.1	0.1	0.1	0.423823	1.00317	1.36723	0.800554	0.981005	1.27859	0.45972	0.59051	0.387933	0.46009	0.0142857	0	0.1	0	0.0714286	0.1	0.1	0.1	0.0142857	0.0333333	0.1	0.0333333	-1.46523	-1.28155	-1.28155	-1.28155	-2.18935	-1.83391	-1.28155	-1.83391	2.74679	3.4709	0	-0.5
16	34	female	0	12	0	0	0	0.423126	0.661167	0.448813	0.49021	0.0285714	0.1	0.2	0	1.3842	0.835341	1.28358	0.627992	0.368806	0.789602	0.47196	0.585487	0.476967	0.40985	0	0.2	0.1	0	0.0285714	0.1	0.2	0.0333333	0.0047619	0.2	0.1	0.0333333	-1.90222	-1.28155	-0.841621	-1.83391	-2.59266	-0.841621	-1.28155	-1.83391	2.74384	3.87421	-0.333333	0.333333
17	31	male	0	2	0	0	0	0.436888	0.542389	0.36757	0.49651	0.0428571	0.1	0	0	0.137064	0	0.11267	1.14027	0.829242	1.28968	0.424321	0.533911	0.35153	0.4463	0	0.1	0	0	0.0428571	0.1	0.0333333	0.0333333	0.0047619	0.1	0.0333333	0.0333333	-1.71845	-1.28155	-1.83391	-1.83391	-2.59266	-1.28155	-1.83391	-1.83391	3.55237	4.42657	0.5	0.5
18	43	male	0	3	0	0	0	0.477297	0.558922	0.571078	0.53758	0.0428571	0.1	0.1	0	0.178082	1	0	0.425962	1.11742	0	0.458737	0.609778	0.35831	0.39902	0	0.1	0	0	0.0428571	0.1	0.1	0.0333333	0.0047619	0.1	0.0333333	0.0333333	-1.71845	-1.28155	-1.28155	-1.83391	-2.59266	-1.28155	-1.83391	-1.83391	3	4.42657	0	0.5
19	46	female	0	0	0	0	0	0.485906	0.60798	0.56005	0.571	0.0714286	0	0.4	0.2	1.29572	1.05653	1.3653	1.187	1.05653	1.21744	0.505089	0.60202	0.646622	0.49024	0.1	0	0.1	0	0.0714286	0.0333333	0.4	0.2	0.1	0.0333333	0.1	0.0333333	-1.46523	-1.83391	-0.253347	-0.841621	-1.28155	-1.83391	-1.28155	-1.83391	1.71858	2.5631	-0.846154	-0.5
20	52	female	0	12	0	0	0	0.551135	0.77745	0.561433	0.58169	0.0571429	0	0.1	0	1.48881	0.611016	1.28916	1.5852	1.25818	1.66437	0.43716	0.72497	0.399011	0.53781	0.0285714	0	0.1	0	0.0571429	0.0333333	0.1	0.0333333	0.0285714	0.0333333	0.1	0.0333333	-1.57922	-1.83391	-1.28155	-1.83391	-1.90222	-1.83391	-1.28155	-1.83391	2.86077	3.18377	-0.5	-0.5
21	37	female	0	4	0	0	0	0.395654	0.494689	0.33338	0.26045	0.0285714	0.1	0	0	1.0575	1.00359	1.03594	1	0.946092	1	0.419269	0.5397	0.23066	0.37803	0	0.3	0	0	0.0285714	0.1	0.0333333	0.0333333	0.0047619	0.3	0.0333333	0.0333333	-1.90222	-1.28155	-1.83391	-1.83391	-2.59266	-0.524401	-1.83391	-1.83391	3.73613	4.42657	0.5	0.8
22	58	female	0	5	0	0	0	0.508113	0.684411	0.395743	0.46763	0.0142857	0.1	0.3	0	0.197466	0.297028	1.41937	0.131091	0.10092	0.894403	0.555717	0.728744	0.392529	0.46662	0.0142857	0.1	0.3	0	0.0142857	0.1	0.3	0.0333333	0.0142857	0.1	0.3	0.0333333	-2.18935	-1.28155	-0.524401	-1.83391	-2.18935	-1.28155	-0.524401	-1.83391	2.71375	2.71375	-0.5	-0.5
23	40	male	0	12	0	0	0	0.410986	0.546875	0.410444	0.4521	0	0.2	0.1	0	0.818287	0.791224	1.08119	0.377537	0.481925	0.46646	0.410314	0.561429	0.3992	0.3747	0	0.3	0	0	0.0047619	0.2	0.1	0.0333333	0.0047619	0.3	0.0333333	0.0333333	-2.59266	-0.841621	-1.28155	-1.83391	-2.59266	-0.524401	-1.83391	-1.83391	3.87421	4.42657	0.333333	0.8
24	60	male	0	9	0	0	0	0.564607	0.745083	0.741022	0.59075	0.171429	0.4	0.1	0.2	1.17879	1	1.2091	1.24849	1	1.22425	0.410104	0.345373	0.377162	0.4774	0.214286	0.1	0.3	0	0.171429	0.4	0.1	0.2	0.214286	0.1	0.3	0.0333333	-0.948535	-0.253347	-1.28155	-0.841621	-0.791639	-1.28155	-0.524401	-1.83391	2.23009	1.31604	0.6	-0.5
25	63	male	0	12	0	0	0	0.475895	0.638944	0.72205	0.57034	0.114286	0.1	0.6	0	1.45271	0.857539	1.15196	0.870202	0.502968	1.10131	0.460651	0.592011	0.52225	0.54163	0.0142857	0.1	0.2	0	0.114286	0.1	0.6	0.0333333	0.0142857	0.1	0.2	0.0333333	-1.20405	-1.28155	0.253347	-1.83391	-2.18935	-1.28155	-0.841621	-1.83391	0.9507	3.03097	-0.714286	-0.333333
26	43	female	0	0	0	0	0	0.387109	0.606483	0.40301	0.3542	0.0142857	0.4	0	0.2	1.98019	1.08938	1.63757	0.868911	0.514375	0.475644	0.397409	0.5535	0.331444	0.351722	0	0.3	0.1	0.1	0.0142857	0.4	0.0333333	0.2	0.0047619	0.3	0.1	0.1	-2.18935	-0.253347	-1.83391	-0.841621	-2.59266	-0.524401	-1.28155	-1.28155	4.02326	3.87421	0.846154	0.5
27	42	female	0	2	0	0	0	0.503263	0.643	0.50759	0.45876	0.0714286	0.2	0	0	1	1	0.995651	1.01305	1	1	0.47876	0.658744	0.45725	0.44606	0.0428571	0.1	0	0	0.0714286	0.2	0.0333333	0.0333333	0.0428571	0.1	0.0333333	0.0333333	-1.46523	-0.841621	-1.83391	-1.83391	-1.71845	-1.28155	-1.83391	-1.83391	3.29915	3.55237	0.714286	0.5
28	44	male	0	0	0	0	0	0.492261	0.530056	0.436975	0.47739	0.0571429	0.1	0.2	0	0.757484	1.00303	1.0576	1.22736	1.12429	1.18492	0.439122	0.58035	0.384475	0.47561	0.0285714	0.2	0.2	0	0.0571429	0.1	0.2	0.0333333	0.0285714	0.2	0.2	0.0333333	-1.57922	-1.28155	-0.841621	-1.83391	-1.90222	-0.841621	-0.841621	-1.83391	2.42084	2.74384	-0.333333	0
29	36	male	0	6	0	0	0	0.396605	0.476344	0.36039	0.37841	0.0571429	0.1	0	0	0.739074	0.813003	1.23483	0.534681	1.21744	1.32616	0.407387	0.504567	0.32498	0.31894	0.0428571	0.1	0	0	0.0571429	0.1	0.0333333	0.0333333	0.0428571	0.1	0.0333333	0.0333333	-1.57922	-1.28155	-1.83391	-1.83391	-1.71845	-1.28155	-1.83391	-1.83391	3.41313	3.55237	0.5	0.5
30	40	male	0	3	0	0	0	0.458265	0.64607	0.53846	0.5171	0.0142857	0	0	0	1.17603	0.926676	1.34085	1.43805	1.29859	1.59302	0.427409	0.6331	0.4768	0.45125	0	0	0.1	0	0.0142857	0.0333333	0.0333333	0.0333333	0.0047619	0.0333333	0.1	0.0333333	-2.18935	-1.83391	-1.83391	-1.83391	-2.59266	-1.83391	-1.28155	-1.83391	4.02326	3.87421	0	-0.5
31	38	male	0	10	0	0	0	0.427512	0.51623	0.45399	0.37977	0.0285714	0	0	0	1.29753	1.0175	1.23627	1.52505	0.833734	1.70882	0.413287	0.5192	0.3997	0.37204	0	0.2	0	0	0.0285714	0.0333333	0.0333333	0.0333333	0.0047619	0.2	0.0333333	0.0333333	-1.90222	-1.83391	-1.83391	-1.83391	-2.59266	-0.841621	-1.83391	-1.83391	3.73613	4.42657	0	0.714286
32	29	female	0	11	0	0	0	0.474793	0.62581	0.440556	0.436067	0.0285714	0	0.1	0.1	1.01379	0	1.08057	0.377913	0.859903	0.900553	0.439307	0.551617	0.441456	0.39293	0.0285714	0.4	0.1	0	0.0285714	0.0333333	0.1	0.1	0.0285714	0.4	0.1	0.0333333	-1.90222	-1.83391	-1.28155	-1.28155	-1.90222	-0.253347	-1.28155	-1.83391	3.18377	3.18377	-0.5	0.6
33	30	male	0	13	0	0	0	0.503854	0.62945	0.40287	0.40638	0.0285714	0.2	0	0	1.66887	1.08258	1.36746	1.2725	1.77622	1.28076	0.50242	0.58482	0.4348	0.41977	0	0	0	0	0.0285714	0.2	0.0333333	0.0333333	0.0047619	0.0333333	0.0333333	0.0333333	-1.90222	-0.841621	-1.83391	-1.83391	-2.59266	-1.83391	-1.83391	-1.83391	3.73613	4.42657	0.714286	0
34	35	female	0	6	0	0	0	0.401916	0.679114	0.526614	0.45712	0	0.3	0.3	0	0.272514	0.586389	0.111176	0	0	0	0.409743	0.52641	0.3956	0.4224	0.0142857	0	0.2	0	0.0047619	0.3	0.3	0.0333333	0.0142857	0.0333333	0.2	0.0333333	-2.59266	-0.524401	-0.524401	-1.83391	-2.18935	-1.83391	-0.841621	-1.83391	3.11706	3.03097	0	-0.714286
35	47	female	0	26	1	0	0	0.556338	0.740757	0.659856	0.4956	0.0571429	0.3	0.1	0	0	0.337335	0.843137	0	1.14726	0.839936	0.524825	0.732588	0.448175	0.485656	0.128571	0.2	0.2	0.1	0.0571429	0.3	0.1	0.0333333	0.128571	0.2	0.2	0.1	-1.57922	-0.524401	-1.28155	-1.83391	-1.13317	-0.841621	-0.841621	-1.28155	2.86077	1.97479	0.5	0
36	49	male	0	26	1	0	0	0.440319	0.626378	0.471871	0.4821	0	0.1	0.3	0	1.67884	1.21723	1.3711	1.12973	0.924574	0.900437	0.430464	0.56665	0.5464	0.50064	0	0	0.1	0	0.0047619	0.1	0.3	0.0333333	0.0047619	0.0333333	0.1	0.0333333	-2.59266	-1.28155	-0.524401	-1.83391	-2.59266	-1.83391	-1.28155	-1.83391	3.11706	3.87421	-0.5	-0.5
37	35	male	0	27	1	0	0	0.430409	0.55445	0.4234	0.48172	0.0428571	0.2	0	0	1.21029	1.11886	1.46171	1.20571	1.11429	1.16914	0.445013	0.551013	0.3712	0.41629	0.0142857	0.2	0	0	0.0428571	0.2	0.0333333	0.0333333	0.0142857	0.2	0.0333333	0.0333333	-1.71845	-0.841621	-1.83391	-1.83391	-2.18935	-0.841621	-1.83391	-1.83391	3.55237	4.02326	0.714286	0.714286
38	42	male	0	29	1	0	0	0.430016	0.62667	0.45006	0.48723	0.0285714	0	0	0	1.896	1.07771	1.90971	1.11886	0.84	0.561143	0.398509	0.5227	0.31111	0.28396	0	0.3	0	0	0.0285714	0.0333333	0.0333333	0.0333333	0.0047619	0.3	0.0333333	0.0333333	-1.90222	-1.83391	-1.83391	-1.83391	-2.59266	-0.524401	-1.83391	-1.83391	3.73613	4.42657	0	0.8
39	60	male	0	16	1	0	0	0.451013	0.69407	0.565911	0.58428	0.0428571	0	0.1	0	1.24912	1.1261	1.2891	0.769337	0.923112	1.16608	0.487606	0.657922	0.4571	0.48003	0.0571429	0.1	0.2	0	0.0428571	0.0333333	0.1	0.0333333	0.0571429	0.1	0.2	0.0333333	-1.71845	-1.83391	-1.28155	-1.83391	-1.57922	-1.28155	-0.841621	-1.83391	3	2.42084	-0.5	-0.333333
40	47	male	0	31	1	0	0	0.440768	0.541875	0.3797	0.429556	0.2	0.2	0	0.1	0.744975	1.14696	1.134	1.14264	0	1.09509	0.419016	0.585889	0.331	0.3339	0.128571	0.1	0.1	0	0.2	0.2	0.0333333	0.1	0.128571	0.1	0.1	0.0333333	-0.841621	-0.841621	-1.83391	-1.28155	-1.13317	-1.28155	-1.28155	-1.83391	2.67554	2.41472	0.714286	0
41	36	male	0	19	1	0	0	0.406907	0.537443	0.3188	0.29358	0.0285714	0.3	0.1	0	1.9052	1.18281	1.8079	1.77547	0.964617	0.95872	0.391775	0.614429	0.30182	0.29383	0.0142857	0.3	0	0	0.0285714	0.3	0.1	0.0333333	0.0142857	0.3	0.0333333	0.0333333	-1.90222	-0.524401	-1.28155	-1.83391	-2.18935	-0.524401	-1.83391	-1.83391	3.18377	4.02326	0.5	0.8
42	44	female	0	16	1	0	0	0.425085	0.570733	0.42833	0.41851	0.0285714	0.1	0	0	0.777405	0.978655	0.884129	1.69828	1.24089	1.38116	0.402851	0.515233	0.36285	0.4238	0.0285714	0.1	0	0	0.0285714	0.1	0.0333333	0.0333333	0.0285714	0.1	0.0333333	0.0333333	-1.90222	-1.28155	-1.83391	-1.83391	-1.90222	-1.28155	-1.83391	-1.83391	3.73613	3.73613	0.5	0.5
43	46	male	0	24	1	0	0	0.449151	0.581037	0.46542	0.39902	0.0285714	0.2	0	0	0.266156	0.721939	1.19813	1.1199	0.769558	1.3716	0.415521	0.594163	0.34874	0.4055	0.0428571	0.2	0	0	0.0285714	0.2	0.0333333	0.0333333	0.0428571	0.2	0.0333333	0.0333333	-1.90222	-0.841621	-1.83391	-1.83391	-1.71845	-0.841621	-1.83391	-1.83391	3.73613	3.55237	0.714286	0.714286
44	38	female	0	19	1	0	0	0.433578	0.51627	0.56772	0.51998	0.0142857	0	0	0	1.9371	1.31726	1.88208	1.36494	1.83074	1.84907	0.455453	0.507325	0.53724	0.44663	0	0.2	0	0	0.0142857	0.0333333	0.0333333	0.0333333	0.0047619	0.2	0.0333333	0.0333333	-2.18935	-1.83391	-1.83391	-1.83391	-2.59266	-0.841621	-1.83391	-1.83391	4.02326	4.42657	0	0.714286
45	47	male	0	17	1	0	0	0.440062	0.587278	0.374956	0.453967	0.0285714	0.1	0.1	0.1	0.0768194	0	0	0.0813118	0	0	0.426086	0.55872	0.344757	0.39332	0	0	0.3	0	0.0285714	0.1	0.1	0.1	0.0047619	0.0333333	0.3	0.0333333	-1.90222	-1.28155	-1.28155	-1.28155	-2.59266	-1.83391	-0.524401	-1.83391	3.18377	3.11706	0	-0.8
46	42	male	0	21	1	0	0	0.541257	0.640811	0.506289	0.49017	0.0428571	0.1	0.1	0	1.20261	0.80372	1.06332	1.07598	0.867036	0.927187	0.553517	0.75612	0.57535	0.524613	0.0857143	0	0.4	0.2	0.0428571	0.1	0.1	0.0333333	0.0857143	0.0333333	0.4	0.2	-1.71845	-1.28155	-1.28155	-1.83391	-1.36763	-1.83391	-0.253347	-0.841621	3	1.62098	0	-0.846154
47	64	male	0	21	1	0	0	0.564827	0.710389	0.621962	0.56583	0.0571429	0.1	0.2	0	1.5201	1.05883	1.37419	1.15297	0.861149	1.11532	0.491513	0.673062	0.518278	0.56687	0.0285714	0.2	0.1	0	0.0571429	0.1	0.2	0.0333333	0.0285714	0.2	0.1	0.0333333	-1.57922	-1.28155	-0.841621	-1.83391	-1.90222	-0.841621	-1.28155	-1.83391	2.42084	3.18377	-0.333333	0.333333
48	47	male	0	18	1	0	0	0.46744	0.584129	0.58417	0.57869	0.0428571	0.3	0	0	1.67406	1.0087	1.3392	2	1.18265	1.6958	0.435817	0.594375	0.48205	0.480967	0.0571429	0.2	0.4	0.1	0.0428571	0.3	0.0333333	0.0333333	0.0571429	0.2	0.4	0.1	-1.71845	-0.524401	-1.83391	-1.83391	-1.57922	-0.841621	-0.253347	-1.28155	3.55237	1.83257	0.8	-0.333333
49	43	female	0	20	1	0	0	0.661643	0.758022	0.536533	0.6294	0.242857	0.1	0.7	0	0.785974	0.918601	1.08324	0	0.136556	0	0.664813	0.7602	0.665167	0.59697	0.214286	0.1	0.4	0	0.242857	0.1	0.7	0.0333333	0.214286	0.1	0.4	0.0333333	-0.697141	-1.28155	0.524401	-1.83391	-0.791639	-1.28155	-0.253347	-1.83391	0.172741	1.04499	-0.75	-0.6
50	34	female	0	18	1	0	0	0.555506	0.595438	0.53834	0.57916	0.114286	0.2	0.5	0	1.95856	1.51864	1.80111	1.87983	1.54642	1.45381	0.589384	0.6463	0.616	0.593325	0.3	0.2	0.7	0.2	0.114286	0.2	0.5	0.0333333	0.3	0.2	0.7	0.2	-1.20405	-0.841621	0	-1.83391	-0.524401	-0.841621	0.524401	-0.841621	1.20405	0	-0.428571	-0.555556
51	36	female	0	23	1	0	0	0.373141	0.483725	0.289488	0.33083	0.0857143	0.2	0.2	0	0.580892	0.495268	1.16224	1.08562	0.977467	1.25687	0.34207	0.417633	0.28791	0.28516	0.0142857	0.1	0	0	0.0857143	0.2	0.2	0.0333333	0.0142857	0.1	0.0333333	0.0333333	-1.36763	-0.841621	-0.841621	-1.83391	-2.18935	-1.28155	-1.83391	-1.83391	2.20925	4.02326	0	0.5
52	34	male	0	14	1	0	0	0.47117	0.613811	0.379256	0.41805	0	0.1	0.1	0	1.13214	0.984635	1.4333	0.225592	0.139546	0.333148	0.443534	0.6101	0.42971	0.47503	0.0714286	0.1	0	0	0.0047619	0.1	0.1	0.0333333	0.0714286	0.1	0.0333333	0.0333333	-2.59266	-1.28155	-1.28155	-1.83391	-1.46523	-1.28155	-1.83391	-1.83391	3.87421	3.29915	0	0.5
53	40	female	0	28	1	0	0	0.643712	0.727889	0.602667	0.573875	0.157143	0.1	0.4	0.2	1.27806	1	1.13298	1.05239	0.76627	0.871046	0.596328	0.659	0.688	0.637667	0.0857143	0.3	0.4	0.1	0.157143	0.1	0.4	0.2	0.0857143	0.3	0.4	0.1	-1.00627	-1.28155	-0.253347	-0.841621	-1.36763	-0.524401	-0.253347	-1.28155	1.25962	1.62098	-0.6	-0.142857
54	45	male	1	4	0	0	0	0.379497	0.523578	0.342722	0.39765	0	0.1	0.1	0	1.07579	0.915021	1.20441	2	2	2	0.361424	0.527644	0.30657	0.35496	0	0.1	0	0	0.0047619	0.1	0.1	0.0333333	0.0047619	0.1	0.0333333	0.0333333	-2.59266	-1.28155	-1.28155	-1.83391	-2.59266	-1.28155	-1.83391	-1.83391	3.87421	4.42657	0	0.5
55	36	male	1	5	0	0	0	0.657921	0.57977	0.4641	0.50758	0.128571	0	0	0	1.26742	1.09148	1.17593	2	1.80753	1.67382	0.477631	0.8846	0.513989	0.50127	0.0285714	0.8	0.1	0	0.128571	0.0333333	0.0333333	0.0333333	0.0285714	0.8	0.1	0.0333333	-1.13317	-1.83391	-1.83391	-1.83391	-1.90222	0.841621	-1.28155	-1.83391	2.96708	3.18377	0	0.777778
56	45	male	1	0	0	0	0	0.489522	0.603237	0.62615	0.49031	0.157143	0.2	0.2	0	0.996411	0	1.10768	1.40629	1.15727	1.38663	0.491974	0.57114	0.500911	0.51117	0.128571	0	0.1	0	0.157143	0.2	0.2	0.0333333	0.128571	0.0333333	0.1	0.0333333	-1.00627	-0.841621	-0.841621	-1.83391	-1.13317	-1.83391	-1.28155	-1.83391	1.84789	2.41472	0	-0.5
57	43	male	1	13	0	0	0	0.504004	0.61756	0.49861	0.53002	0	0	0	0	1.21421	0.840097	1.39222	1.87796	1.49781	1.53402	0.486781	0.63779	0.494	0.43972	0.0285714	0	0	0	0.0047619	0.0333333	0.0333333	0.0333333	0.0285714	0.0333333	0.0333333	0.0333333	-2.59266	-1.83391	-1.83391	-1.83391	-1.90222	-1.83391	-1.83391	-1.83391	4.42657	3.73613	0	0
58	42	female	1	2	0	0	0	0.570171	0.67248	0.539637	0.52424	0.214286	0.5	0.2	0	1.1696	0.886932	1.12177	1.3479	0.969559	1.30876	0.508502	0.476589	0.4379	0.46003	0.1	0.1	0.4	0	0.214286	0.5	0.2	0.0333333	0.1	0.1	0.4	0.0333333	-0.791639	0	-0.841621	-1.83391	-1.28155	-1.28155	-0.253347	-1.83391	1.63326	1.5349	0.428571	-0.6
59	65	male	1	7	0	0	0	0.487588	0.65855	0.67164	0.596256	0.0428571	0.2	0.5	0.1	1.19444	1.19841	1.49603	2	2	2	0.463099	0.62775	0.60353	0.54223	0.0285714	0.2	0	0	0.0428571	0.2	0.5	0.1	0.0285714	0.2	0.0333333	0.0333333	-1.71845	-0.841621	0	-1.28155	-1.90222	-0.841621	-1.83391	-1.83391	1.71845	3.73613	-0.428571	0.714286
60	33	female	1	2	0	0	0	0.417165	0.612733	0.495478	0.4616	0.0571429	0.1	0.1	0	0.815467	0.86551	0.568379	1.46915	1.2033	1.66933	0.48041	0.540863	0.496483	0.58123	0.157143	0.2	0.4	0	0.0571429	0.1	0.1	0.0333333	0.157143	0.2	0.4	0.0333333	-1.57922	-1.28155	-1.28155	-1.83391	-1.00627	-0.841621	-0.253347	-1.83391	2.86077	1.25962	0	-0.333333
61	51	male	1	0	0	0	0	0.366848	0.534767	0.34123	0.37468	0.0857143	0.1	0	0	1.1042	1.01737	1.21845	0.925964	0.999086	0.999086	0.3886	0.492557	0.4025	0.26452	0.0714286	0.3	0.1	0	0.0857143	0.1	0.0333333	0.0333333	0.0714286	0.3	0.1	0.0333333	-1.36763	-1.28155	-1.83391	-1.83391	-1.46523	-0.524401	-1.28155	-1.83391	3.20154	2.74679	0.5	0.5
62	47	female	1	4	0	0	0	0.4553	0.666789	0.415737	0.45193	0.0857143	0.1	0.2	0	1.70013	1.14896	1.45583	1.99806	1.97721	1.98615	0.396659	0.580729	0.35765	0.35128	0	0.3	0	0	0.0857143	0.1	0.2	0.0333333	0.0047619	0.3	0.0333333	0.0333333	-1.36763	-1.28155	-0.841621	-1.83391	-2.59266	-0.524401	-1.83391	-1.83391	2.20925	4.42657	-0.333333	0.8
63	39	female	1	10	0	0	0	0.565393	0.56103	0.592975	0.59097	0.0428571	0	0.2	0	1.12312	0.985515	1.14123	1.79667	0.978273	1.57577	0.441839	0.52892	0.59562	0.47849	0	0	0	0	0.0428571	0.0333333	0.2	0.0333333	0.0047619	0.0333333	0.0333333	0.0333333	-1.71845	-1.83391	-0.841621	-1.83391	-2.59266	-1.83391	-1.83391	-1.83391	2.56007	4.42657	-0.714286	0
64	26	male	1	0	0	0	0	0.570171	0.67248	0.539637	0.52424	0.214286	0.5	0.2	0	1.1696	0.886932	1.12177	1.3479	0.969559	1.30876	0.327524	0.277914	0.276086	0.324183	0.457143	0.5	0	0.1	0.214286	0.5	0.2	0.0333333	0.457143	0.5	0.0333333	0.1	-0.791639	0	-0.841621	-1.83391	-0.107634	0	-1.83391	-1.28155	1.63326	1.94155	0.428571	0.875
65	41	female	1	10	0	0	0	0.550868	0.680588	0.578429	0.565633	0.157143	0.2	0.3	0.1	0	16.4121	0	0	0.838365	0	0.511408	0.615314	0.569514	0.530167	0.142857	0.3	0.3	0.1	0.157143	0.2	0.3	0.1	0.142857	0.3	0.3	0.1	-1.00627	-0.841621	-0.524401	-1.28155	-1.06757	-0.524401	-0.524401	-1.28155	1.53067	1.59197	-0.2	0
66	55	male	1	0	0	0	0	0.481022	0.576767	0.48185	0.48371	0.285714	0.1	0.2	0	1.0761	0.928245	1.0848	1.46314	1.10654	1.54577	0.477469	0.58725	0.512467	0.50463	0.0428571	0	0.1	0	0.285714	0.1	0.2	0.0333333	0.0428571	0.0333333	0.1	0.0333333	-0.565949	-1.28155	-0.841621	-1.83391	-1.71845	-1.83391	-1.28155	-1.83391	1.40757	3	-0.333333	-0.5
67	39	female	1	9	0	0	0	0.485729	0.612143	0.419237	0.441122	0.157143	0.3	0.2	0.1	1.2631	1.00411	1.19322	1.27544	0	1.26721	0.479887	0.63305	0.357825	0.502078	0.114286	0.4	0.2	0.1	0.157143	0.3	0.2	0.1	0.114286	0.4	0.2	0.1	-1.00627	-0.524401	-0.841621	-1.28155	-1.20405	-0.253347	-0.841621	-1.28155	1.84789	2.04567	0.2	0.333333
68	36	male	1	0	0	0	0	0.456715	0.602475	0.53625	0.47627	0.0714286	0.2	0.4	0	1.83295	1.31848	1.64002	1.99219	1.95238	1.80539	0.486683	0.585044	0.659217	0.46925	0.1	0.1	0.4	0	0.0714286	0.2	0.4	0.0333333	0.1	0.1	0.4	0.0333333	-1.46523	-0.841621	-0.253347	-1.83391	-1.28155	-1.28155	-0.253347	-1.83391	1.71858	1.5349	-0.333333	-0.6
69	35	male	1	13	0	0	0	0.433986	0.560778	0.4824	0.4415	0	0.1	0	0	1.2861	1.08506	1.38276	1.54514	1.80031	1.47555	0.415246	0.516333	0.4012	0.4352	0.0142857	0.1	0	0	0.0047619	0.1	0.0333333	0.0333333	0.0142857	0.1	0.0333333	0.0333333	-2.59266	-1.28155	-1.83391	-1.83391	-2.18935	-1.28155	-1.83391	-1.83391	4.42657	4.02326	0.5	0.5
70	44	female	1	0	0	0	0	0.435928	0.541625	0.445444	0.4567	0.0142857	0.2	0.1	0	1.36075	0.921437	1.3864	2	1.75196	2	0.4253	0.594143	0.372778	0.3879	0	0.3	0.1	0	0.0142857	0.2	0.1	0.0333333	0.0047619	0.3	0.1	0.0333333	-2.18935	-0.841621	-1.28155	-1.83391	-2.59266	-0.524401	-1.28155	-1.83391	3.4709	3.87421	0.333333	0.5
71	48	male	1	13	0	0	0	0.395826	0.556889	0.373889	0.4278	0.0142857	0.1	0.1	0	0.817863	1.00219	1.03731	1.18653	1.08997	1.09875	0.371855	0.577286	0.380556	0.3202	0.0142857	0.3	0.1	0	0.0142857	0.1	0.1	0.0333333	0.0142857	0.3	0.1	0.0333333	-2.18935	-1.28155	-1.28155	-1.83391	-2.18935	-0.524401	-1.28155	-1.83391	3.4709	3.4709	0	0.5
72	43	female	1	3	0	0	0	0.481481	0.637813	0.48138	0.43483	0	0.2	0	0	0.17429	0.630933	0.62155	1.28149	1.03753	1.14387	0.468973	0.65794	0.3993	0.52087	0.0428571	0.5	0.1	0	0.0047619	0.2	0.0333333	0.0333333	0.0428571	0.5	0.1	0.0333333	-2.59266	-0.841621	-1.83391	-1.83391	-1.71845	0	-1.28155	-1.83391	4.42657	3	0.714286	0.666667
73	33	male	1	4	0	0	0	0.489942	0.660478	0.45221	0.46155	0.0428571	0.1	0	0	0.997051	0.767065	0.929235	1.74598	1.24473	1.08846	0.441104	0.576412	0.327389	0.29312	0.0142857	0.2	0.1	0	0.0428571	0.1	0.0333333	0.0333333	0.0142857	0.2	0.1	0.0333333	-1.71845	-1.28155	-1.83391	-1.83391	-2.18935	-0.841621	-1.28155	-1.83391	3.55237	3.4709	0.5	0.333333
74	38	female	1	11	0	0	0	0.53986	0.615183	0.32921	0.32566	0.0428571	0.4	0	0	1.97727	0	1.55599	1.99265	1.98035	1.9988	0.527919	0.622089	0.313244	0.3127	0.0857143	0.1	0.1	0.1	0.0428571	0.4	0.0333333	0.0333333	0.0857143	0.1	0.1	0.1	-1.71845	-0.253347	-1.83391	-1.83391	-1.36763	-1.28155	-1.28155	-1.28155	3.55237	2.64918	0.846154	0
75	41	female	1	0	0	0	0	0.402043	0.586338	0.362467	0.36331	0.0285714	0.2	0.1	0	1.73974	1.16173	1.71578	1.99131	1.93741	1.75771	0.384739	0.571333	0.36083	0.31862	0.0428571	0.7	0	0	0.0285714	0.2	0.1	0.0333333	0.0428571	0.7	0.0333333	0.0333333	-1.90222	-0.841621	-1.28155	-1.83391	-1.71845	0.524401	-1.83391	-1.83391	3.18377	3.55237	0.333333	0.909091
76	42	female	1	2	0	0	0	0.546372	0.664511	0.497067	0.516378	0.0714286	0.1	0.1	0.1	0.423823	1.00317	1.36723	0.800554	0.981005	1.27859	0.45972	0.59051	0.387933	0.46009	0.0142857	0	0.1	0	0.0714286	0.1	0.1	0.1	0.0142857	0.0333333	0.1	0.0333333	-1.46523	-1.28155	-1.28155	-1.28155	-2.18935	-1.83391	-1.28155	-1.83391	2.74679	3.4709	0	-0.5
77	42	male	1	6	0	0	0	0.519237	0.689378	0.395	0.42267	0.0285714	0.1	0	0	0.511796	0	1.20642	1.36042	1.38008	1.00655	0.488233	0.658389	0.392422	0.37462	0	0.1	0.1	0	0.0285714	0.1	0.0333333	0.0333333	0.0047619	0.1	0.1	0.0333333	-1.90222	-1.28155	-1.83391	-1.83391	-2.59266	-1.28155	-1.28155	-1.83391	3.73613	3.87421	0.5	0
78	45	male	1	2	0	0	0	0.629353	0.606	0.680711	0.680133	0.271429	0	0.6	0	1.50795	1.00607	1.48936	1.97265	1.95406	1.96336	0.654151	0.758344	0.706187	0.53342	0.1	0.1	0.2	0	0.271429	0.0333333	0.6	0.0333333	0.1	0.1	0.2	0.0333333	-0.608498	-1.83391	0.253347	-1.83391	-1.28155	-1.28155	-0.841621	-1.83391	0.355151	2.12317	-0.894737	-0.333333
79	37	male	1	8	0	0	0	0.414479	0.48675	0.339656	0.38548	0.0428571	0	0.1	0	1.48435	1.10316	1	1.60464	1.52945	1	0.405322	0.557775	0.34461	0.40864	0.0428571	0.6	0	0	0.0428571	0.0333333	0.1	0.0333333	0.0428571	0.6	0.0333333	0.0333333	-1.71845	-1.83391	-1.28155	-1.83391	-1.71845	0.253347	-1.83391	-1.83391	3	3.55237	-0.5	0.894737
80	43	male	1	3	0	0	0	0.524271	0.65325	0.556111	0.5455	0.157143	0.2	0.1	0	0.912846	0.996211	0.89011	0.909056	1	0.924214	0.464159	0.65275	0.5925	0.4949	0.0142857	0.2	0	0	0.157143	0.2	0.1	0.0333333	0.0142857	0.2	0.0333333	0.0333333	-1.00627	-0.841621	-1.28155	-1.83391	-2.18935	-0.841621	-1.83391	-1.83391	2.28782	4.02326	0.333333	0.714286
81	25	female	1	13	0	0	0	0.64697	0.589789	0.70174	0.62714	0.1	0.1	0.5	0	1.19946	1.14461	1.43096	1.24546	1.08644	1.49124	0.656943	0.63927	0.5607	0.588656	0.142857	0	0.7	0.1	0.1	0.1	0.5	0.0333333	0.142857	0.0333333	0.7	0.1	-1.28155	-1.28155	0	-1.83391	-1.06757	-1.83391	0.524401	-1.28155	1.28155	0.54317	-0.666667	-0.909091
82	43	male	1	0	0	0	0	0.40763	0.47998	0.47919	0.3684	0	0	0	0	0.54449	0.766531	1.4098	1.63184	1.21061	0.844898	0.37109	0.451167	0.341444	0.30234	0.0142857	0.1	0.1	0	0.0047619	0.0333333	0.0333333	0.0333333	0.0142857	0.1	0.1	0.0333333	-2.59266	-1.83391	-1.83391	-1.83391	-2.18935	-1.28155	-1.28155	-1.83391	4.42657	3.4709	0	0
83	40	male	1	13	0	0	0	0.498547	0.629356	0.46077	0.49179	0	0.1	0	0	0.894226	0.93778	1.24266	1.37954	1.55376	1.15866	0.49302	0.60722	0.393488	0.38996	0.0714286	0	0.2	0	0.0047619	0.1	0.0333333	0.0333333	0.0714286	0.0333333	0.2	0.0333333	-2.59266	-1.28155	-1.83391	-1.83391	-1.46523	-1.83391	-0.841621	-1.83391	4.42657	2.30686	0.5	-0.714286
84	32	male	1	2	0	0	0	0.419056	0.493662	0.387856	0.31569	0.0285714	0.2	0.1	0	0.73625	0.989397	0.483103	0.20818	1.00845	0.534821	0.400665	0.506262	0.29223	0.28134	0.0142857	0.2	0	0	0.0285714	0.2	0.1	0.0333333	0.0142857	0.2	0.0333333	0.0333333	-1.90222	-0.841621	-1.28155	-1.83391	-2.18935	-0.841621	-1.83391	-1.83391	3.18377	4.02326	0.333333	0.714286
85	34	male	1	11	0	0	0	0.556324	0.617	0.416778	0.3922	0.0285714	0.2	0.1	0	1.0731	0.990466	1.04132	1.93437	1.27332	1.88988	0.576953	0.6717	0.518667	0.5232	0.0857143	0	0.7	0	0.0285714	0.2	0.1	0.0333333	0.0857143	0.0333333	0.7	0.0333333	-1.90222	-0.841621	-1.28155	-1.83391	-1.36763	-1.83391	0.524401	-1.83391	3.18377	0.843227	0.333333	-0.909091
86	42	male	1	2	0	0	0	0.547025	0.665911	0.626314	0.63496	0.0714286	0.1	0.3	0	1.48265	1.11917	1.1877	1.46477	1.11619	1.39625	0.482733	0.73688	0.506233	0.51883	0.0428571	0.5	0.1	0	0.0714286	0.1	0.3	0.0333333	0.0428571	0.5	0.1	0.0333333	-1.46523	-1.28155	-0.524401	-1.83391	-1.71845	0	-1.28155	-1.83391	1.98963	3	-0.5	0.666667
87	35	male	1	4	0	0	0	0.516928	0.49289	0.519629	0.46485	0.142857	0	0.3	0	0.557184	0.824176	1.22792	1.51119	1.11396	1.62515	0.431888	0.499778	0.37229	0.36077	0.0285714	0.1	0	0	0.142857	0.0333333	0.3	0.0333333	0.0285714	0.1	0.0333333	0.0333333	-1.06757	-1.83391	-0.524401	-1.83391	-1.90222	-1.28155	-1.83391	-1.83391	1.59197	3.73613	-0.8	0.5
88	38	male	1	3	0	0	0	0.483617	0.5882	0.47332	0.41325	0.0142857	0.1	0	0	1.25371	1.10286	1.304	1.82511	1.58298	1.54573	0.414069	0.525644	0.41691	0.36968	0.0285714	0.1	0	0	0.0142857	0.1	0.0333333	0.0333333	0.0285714	0.1	0.0333333	0.0333333	-2.18935	-1.28155	-1.83391	-1.83391	-1.90222	-1.28155	-1.83391	-1.83391	4.02326	3.73613	0.5	0.5
89	44	female	1	13	0	0	0	0.425026	0.565313	0.406767	0.37027	0	0.2	0.1	0	1.05596	0.928494	0.962692	1.89849	1.63423	1.59381	0.482439	0.564267	0.53885	0.46835	0	0.1	0	0	0.0047619	0.2	0.1	0.0333333	0.0047619	0.1	0.0333333	0.0333333	-2.59266	-0.841621	-1.28155	-1.83391	-2.59266	-1.28155	-1.83391	-1.83391	3.87421	4.42657	0.333333	0.5
90	44	male	1	6	0	0	0	0.401239	0.537187	0.36534	0.35028	0.0428571	0.2	0	0	0.151251	0.987564	0.462148	1.56583	1.98554	0.403078	0.470872	0.570333	0.35529	0.35809	0.0142857	0.1	0	0	0.0428571	0.2	0.0333333	0.0333333	0.0142857	0.1	0.0333333	0.0333333	-1.71845	-0.841621	-1.83391	-1.83391	-2.18935	-1.28155	-1.83391	-1.83391	3.55237	4.02326	0.714286	0.5
91	32	male	1	0	0	0	0	0.401315	0.477756	0.35021	0.38566	0.0285714	0.1	0	0	0	0	0.101508	0.33779	0.272501	0.459039	0.371175	0.456467	0.30053	0.33575	0.0142857	0.1	0	0	0.0285714	0.1	0.0333333	0.0333333	0.0142857	0.1	0.0333333	0.0333333	-1.90222	-1.28155	-1.83391	-1.83391	-2.18935	-1.28155	-1.83391	-1.83391	3.73613	4.02326	0.5	0.5
92	39	female	1	5	0	0	0	0.546823	0.47156	0.573511	0.62985	0.0428571	0	0.1	0	1.26614	1.01879	1.15342	1.89237	1.70137	1.71389	0.503064	0.702438	0.588478	0.68769	0.0571429	0.2	0.1	0	0.0428571	0.0333333	0.1	0.0333333	0.0571429	0.2	0.1	0.0333333	-1.71845	-1.83391	-1.28155	-1.83391	-1.57922	-0.841621	-1.28155	-1.83391	3	2.86077	-0.5	0.333333
93	43	male	1	0	0	0	0	0.446629	0.494978	0.34192	0.40364	0.0285714	0.1	0	0	1.17886	0.862417	1.13758	1.9906	0.857831	1.88053	0.429089	0.512211	0.34515	0.39875	0	0.1	0	0	0.0285714	0.1	0.0333333	0.0333333	0.0047619	0.1	0.0333333	0.0333333	-1.90222	-1.28155	-1.83391	-1.83391	-2.59266	-1.28155	-1.83391	-1.83391	3.73613	4.42657	0.5	0.5
94	37	male	1	6	0	0	0	0.438923	0.53055	0.34457	0.35464	0.0571429	0	0	0	1.40093	1.11817	1.28698	1.8525	1.56974	1.72589	0.399683	0.509114	0.346656	0.27363	0	0.3	0.1	0	0.0571429	0.0333333	0.0333333	0.0333333	0.0047619	0.3	0.1	0.0333333	-1.57922	-1.83391	-1.83391	-1.83391	-2.59266	-0.524401	-1.28155	-1.83391	3.41313	3.87421	0	0.5
95	26	female	1	30	1	0	0	0.388312	0.508857	0.3703	0.46349	0.0428571	0.3	0.4	0	1.60629	1.23645	1.89731	1.9155	1.92762	1.8094	0.39074	0.5888	0.435	0.48269	0	0.2	0.1	0	0.0428571	0.3	0.4	0.0333333	0.0047619	0.2	0.1	0.0333333	-1.71845	-0.524401	-0.253347	-1.83391	-2.59266	-0.841621	-1.28155	-1.83391	1.9718	3.87421	-0.142857	0.333333
96	35	female	1	16	1	0	0	0.480103	0.61844	0.404471	0.60573	0.157143	0	0.3	0	1.63705	1.03201	1.4898	1.62425	1.03842	1.4962	0.469596	0.648763	0.493089	0.53189	0.0285714	0.2	0.1	0	0.157143	0.0333333	0.3	0.0333333	0.0285714	0.2	0.1	0.0333333	-1.00627	-1.83391	-0.524401	-1.83391	-1.90222	-0.841621	-1.28155	-1.83391	1.53067	3.18377	-0.8	0.333333
97	40	male	1	17	1	0	0	0.485615	0.563571	0.361556	0.4037	0.0714286	0.3	0.1	0	1.30597	1.14982	1.37772	1.17936	1.03165	0.782655	0.483894	0.5252	0.4013	0.4045	0.0571429	0	0	0	0.0714286	0.3	0.1	0.0333333	0.0571429	0.0333333	0.0333333	0.0333333	-1.46523	-0.524401	-1.28155	-1.83391	-1.57922	-1.83391	-1.83391	-1.83391	2.74679	3.41313	0.5	0
98	34	male	1	16	1	0	0	0.442679	0.567944	0.371044	0.41253	0.1	0.1	0.1	0	1.59429	1.27886	1.27886	1.82286	1.80914	1.63086	0.420251	0.532867	0.3529	0.39037	0.0142857	0.1	0.2	0	0.1	0.1	0.1	0.0333333	0.0142857	0.1	0.2	0.0333333	-1.28155	-1.28155	-1.28155	-1.83391	-2.18935	-1.28155	-0.841621	-1.83391	2.5631	3.03097	0	-0.333333
99	30	male	1	21	1	0	0	0.384309	0.514756	0.3437	0.34018	0.0142857	0.1	0	0	1.52142	1.08843	1.54581	1.81415	1.33237	1.57631	0.376119	0.512486	0.36503	0.30525	0.0142857	0.3	0	0	0.0142857	0.1	0.0333333	0.0333333	0.0142857	0.3	0.0333333	0.0333333	-2.18935	-1.28155	-1.83391	-1.83391	-2.18935	-0.524401	-1.83391	-1.83391	4.02326	4.02326	0.5	0.8
100	30	male	1	26	1	0	0	0.469443	0.584222	0.526522	0.47408	0	0.1	0.1	0	1.50675	0.835697	1.34763	1.94258	1.84227	1.82152	0.493159	0.601175	0.46715	0.43195	0.0285714	0.2	0	0	0.0047619	0.1	0.1	0.0333333	0.0285714	0.2	0.0333333	0.0333333	-2.59266	-1.28155	-1.28155	-1.83391	-1.90222	-0.841621	-1.83391	-1.83391	3.87421	3.73613	0	0.714286
101	51	male	1	24	1	0	0	0.4845	0.704622	0.5703	0.60733	0.0428571	0.1	0.1	0	1.58502	1.19205	1.38115	2	2	1.54956	0.453258	0.4564	0.5787	0.61237	0.0285714	0	0.2	0	0.0428571	0.1	0.1	0.0333333	0.0285714	0.0333333	0.2	0.0333333	-1.71845	-1.28155	-1.28155	-1.83391	-1.90222	-1.83391	-0.841621	-1.83391	3	2.74384	0	-0.714286
102	28	female	1	31	1	0	0	0.395861	0.62014	0.359211	0.34039	0.2	0	0.1	0	1.32608	0.990503	1.19311	1.52869	0.927187	1.44321	0.416191	0.565543	0.366378	0.37116	0.0285714	0.3	0.1	0	0.2	0.0333333	0.1	0.0333333	0.0285714	0.3	0.1	0.0333333	-0.841621	-1.83391	-1.28155	-1.83391	-1.90222	-0.524401	-1.28155	-1.83391	2.12317	3.18377	-0.5	0.5
103	32	male	1	36	1	0	0	0.332132	0.539333	0.299911	0.3548	0.114286	0.7	0.1	0	1.8691	1.01073	1.73421	2	1.00153	2	0.406892	0.627217	0.332667	0.358375	0.142857	0.4	0.1	0.2	0.114286	0.7	0.1	0.0333333	0.142857	0.4	0.1	0.2	-1.20405	0.524401	-1.28155	-1.83391	-1.06757	-0.253347	-1.28155	-0.841621	2.4856	2.34912	0.75	0.6
104	37	male	1	29	1	0	0	0.469851	0.67275	0.517875	0.5341	0.0428571	0.2	0.2	0	2	0.98667	1.99089	2	0	1.96867	0.506292	0.6178	0.745125	0.512	0.0714286	0	0.2	0	0.0428571	0.2	0.2	0.0333333	0.0714286	0.0333333	0.2	0.0333333	-1.71845	-0.841621	-0.841621	-1.83391	-1.46523	-1.83391	-0.841621	-1.83391	2.56007	2.30686	0	-0.714286
105	40	female	1	14	1	0	0	0.412095	0.557233	0.377057	0.47434	0.471429	0.1	0.3	0	1.37125	1.61977	1.34398	1.77736	1.90161	1.30761	0.432084	0.52369	0.460883	0.456983	0.114286	0	0.4	0.4	0.471429	0.1	0.3	0.0333333	0.114286	0.0333333	0.4	0.4	-0.0716793	-1.28155	-0.524401	-1.83391	-1.20405	-1.83391	-0.253347	-0.253347	0.59608	1.45739	-0.5	-0.846154
106	38	male	1	17	1	0	0	0.508714	0.632588	0.4801	0.44302	0.2	0.2	0.2	0	1.32434	1.33908	1.84623	2	1.57792	1.87277	0.478414	0.632356	0.39394	0.381767	0.2	0.1	0	0.1	0.2	0.2	0.2	0.0333333	0.2	0.1	0.0333333	0.1	-0.841621	-0.841621	-0.841621	-1.83391	-0.841621	-1.28155	-1.83391	-1.28155	1.68324	2.67554	0	0.5
107	53	male	1	19	1	0	0	0.393371	0.47281	0.35476	0.39364	0.0285714	0	0	0	1.09863	1.10236	1.11368	1.23558	1.23259	1.26218	0.375255	0.514888	0.319111	0.275778	0.0142857	0.2	0.1	0.1	0.0285714	0.0333333	0.0333333	0.0333333	0.0142857	0.2	0.1	0.1	-1.90222	-1.83391	-1.83391	-1.83391	-2.18935	-0.841621	-1.28155	-1.28155	3.73613	3.4709	0	0.333333
108	53	male	1	44	1	0	0	0.456543	0.669133	0.372463	0.39505	0	0.4	0.2	0	2	2	2	1.99492	1.99492	1.99492	0.438734	0.66225	0.434667	0.44172	0	0	0.1	0	0.0047619	0.4	0.2	0.0333333	0.0047619	0.0333333	0.1	0.0333333	-2.59266	-0.253347	-0.841621	-1.83391	-2.59266	-1.83391	-1.28155	-1.83391	3.43428	3.87421	0.333333	-0.5
109	39	male	1	24	1	0	0	0.488288	0.496633	0.399786	0.4297	0.414286	0.1	0.3	0	1.38736	1.23551	1.70034	1.79331	1.23551	1.63217	0.514588	0.59123	0.60647	0.5782	0.142857	0	0	0.1	0.414286	0.1	0.3	0.0333333	0.142857	0.0333333	0.0333333	0.1	-0.216534	-1.28155	-0.524401	-1.83391	-1.06757	-1.83391	-1.83391	-1.28155	0.740935	2.90149	-0.5	0
110	29	female	1	26	1	0	0	0.565762	0.65996	0.478167	0.565456	0.242857	0	0.4	0.1	1.19657	1.15543	1.34286	1.72229	1.41143	1.66743	0.440625	0.613867	0.525413	0.46295	0.0714286	0.4	0.2	0	0.242857	0.0333333	0.4	0.1	0.0714286	0.4	0.2	0.0333333	-0.697141	-1.83391	-0.253347	-1.28155	-1.46523	-0.253347	-0.841621	-1.83391	0.950489	2.30686	-0.846154	0.333333
111	50	male	1	23	1	0	0	0.496372	0.62399	0.428	0.43328	0.128571	0	0.1	0	1.463	1.60366	1.80879	2	2	2	0.537571	0.7193	0.3833	0.401544	0.0571429	0.4	0.3	0.1	0.128571	0.0333333	0.1	0.0333333	0.0571429	0.4	0.3	0.1	-1.13317	-1.83391	-1.28155	-1.83391	-1.57922	-0.253347	-0.524401	-1.28155	2.41472	2.10362	-0.5	0.142857
112	41	female	1	29	1	0	0	0.431764	0.546767	0.44872	0.42028	0.0428571	0.4	0	0	0.987874	0.990906	1.50019	0	1	1.34559	0.426057	0.550571	0.40577	0.391389	0.0142857	0.3	0	0.1	0.0428571	0.4	0.0333333	0.0333333	0.0142857	0.3	0.0333333	0.1	-1.71845	-0.253347	-1.83391	-1.83391	-2.18935	-0.524401	-1.83391	-1.28155	3.55237	4.02326	0.846154	0.8
113	35	male	1	19	1	0	0	0.401014	0.50451	0.365689	0.38747	0.0571429	0	0.1	0	0.708167	1.00471	1.16474	1.98847	1.91786	1.79077	0.404017	0.519378	0.408633	0.39464	0.0142857	0.1	0.1	0	0.0571429	0.0333333	0.1	0.0333333	0.0142857	0.1	0.1	0.0333333	-1.57922	-1.83391	-1.28155	-1.83391	-2.18935	-1.28155	-1.28155	-1.83391	2.86077	3.4709	-0.5	0
114	44	male	1	18	1	0	0	0.412706	0.520575	0.331771	0.36699	0.1	0.2	0.3	0	0.213933	0.162156	1.08002	1.23535	0.962344	1.31537	0.367375	0.540286	0.3063	0.37322	0.0714286	0.3	0.1	0	0.1	0.2	0.3	0.0333333	0.0714286	0.3	0.1	0.0333333	-1.28155	-0.841621	-0.524401	-1.83391	-1.46523	-0.524401	-1.28155	-1.83391	1.80595	2.74679	-0.2	0.5
115	40	female	1	35	1	0	0	0.471303	0.568	0.36586	0.39483	0	0.1	0	0	1.96172	1.58077	1.95425	1.97292	1.91317	1.97666	0.383049	0.49369	0.30423	0.30391	0	0	0	0	0.0047619	0.1	0.0333333	0.0333333	0.0047619	0.0333333	0.0333333	0.0333333	-2.59266	-1.28155	-1.83391	-1.83391	-2.59266	-1.83391	-1.83391	-1.83391	4.42657	4.42657	0.5	0
116	37	female	1	15	1	0	0	0.462887	0.573922	0.40597	0.42447	0.0142857	0.1	0	0	1.41331	1.02818	1.42896	1.8955	1.33816	1.64814	0.427094	0.5656	0.41324	0.37988	0.0142857	0.1	0	0	0.0142857	0.1	0.0333333	0.0333333	0.0142857	0.1	0.0333333	0.0333333	-2.18935	-1.28155	-1.83391	-1.83391	-2.18935	-1.28155	-1.83391	-1.83391	4.02326	4.02326	0.5	0.5
117	42	male	1	22	1	0	0	0.412996	0.38976	0.379067	0.33357	0.2	0	0.1	0	1.51182	1.11022	1.36457	1.78402	1.14592	1.81971	0.425999	0.42771	0.417	0.464322	0.0285714	0	0.1	0.1	0.2	0.0333333	0.1	0.0333333	0.0285714	0.0333333	0.1	0.1	-0.841621	-1.83391	-1.28155	-1.83391	-1.90222	-1.83391	-1.28155	-1.28155	2.12317	3.18377	-0.5	-0.5
118	42	male	1	16	1	0	0	0.394681	0.552556	0.379333	0.3774	0.0142857	0.1	0.1	0	0.730311	1.01173	1.08208	0.523158	1	0.648231	0.354429	0.498125	0.3451	0.3066	0	0.2	0	0	0.0142857	0.1	0.1	0.0333333	0.0047619	0.2	0.0333333	0.0333333	-2.18935	-1.28155	-1.28155	-1.83391	-2.59266	-0.841621	-1.83391	-1.83391	3.4709	4.42657	0	0.714286
119	43	male	1	14	1	0	0	0.492792	0.561488	0.498989	0.44352	0.285714	0.2	0.1	0	1.42825	1.28444	1.45382	1.94279	1.99393	1.80217	0.446747	0.575	0.589425	0.47258	0.114286	0	0.2	0	0.285714	0.2	0.1	0.0333333	0.114286	0.0333333	0.2	0.0333333	-0.565949	-0.841621	-1.28155	-1.83391	-1.20405	-1.83391	-0.841621	-1.83391	1.8475	2.04567	0.333333	-0.714286
120	37	female	1	17	1	0	0	0.56175	0.590786	0.567075	0.595988	0.0857143	0.3	0.2	0.2	0.607535	0.975985	0.880384	2	1.81519	1.97987	0.506604	0.591775	0.52765	0.5111	0.0142857	0.2	0.2	0	0.0857143	0.3	0.2	0.2	0.0142857	0.2	0.2	0.0333333	-1.36763	-0.524401	-0.841621	-0.841621	-2.18935	-0.841621	-0.841621	-1.83391	2.20925	3.03097	0.2	0
121	35	male	1	26	1	0	0	0.433919	0.563589	0.34085	0.333244	0.0285714	0.1	0	0.1	1.15525	0.997014	1.412	1.62099	1.4329	1.86282	0.430714	0.545811	0.29291	0.28819	0.0142857	0.1	0	0	0.0285714	0.1	0.0333333	0.1	0.0142857	0.1	0.0333333	0.0333333	-1.90222	-1.28155	-1.83391	-1.28155	-2.18935	-1.28155	-1.83391	-1.83391	3.73613	4.02326	0.5	0.5
122	37	male	1	20	1	0	0	0.414884	0.5395	0.362	0.3734	0.0142857	0.2	0	0	1.12963	0.915344	0.611111	1.92063	1.19577	1.57672	0.377286	0.4883	0.2961	0.3257	0	0	0	0	0.0142857	0.2	0.0333333	0.0333333	0.0047619	0.0333333	0.0333333	0.0333333	-2.18935	-0.841621	-1.83391	-1.83391	-2.59266	-1.83391	-1.83391	-1.83391	4.02326	4.42657	0.714286	0
123	39	male	1	15	1	0	0	0.534161	0.65355	0.588467	0.59128	0.185714	0	0.4	0	1.65599	1.44147	1.82699	1.93891	1.72439	1.86118	0.49487	0.65571	0.552425	0.49463	0.185714	0	0.2	0	0.185714	0.0333333	0.4	0.0333333	0.185714	0.0333333	0.2	0.0333333	-0.893801	-1.83391	-0.253347	-1.83391	-0.893801	-1.83391	-0.841621	-1.83391	1.14715	1.73542	-0.846154	-0.714286
[truncated: 12 more columns]

## Sheet: Sheet2
1.17603	0.926676	1.34085	1.43805	1.29859	1.59302	0.588013	0.463338	0.670425	0.719027	0.649293	0.796508	0.294006
1.29753	1.0175	1.23627	1.52505	0.833734	1.70882	0.648764	0.508751	0.618136	0.762525	0.416867	0.854408	0.324382
1.01379	0	1.08057	0.377913	0.859903	0.900553	0.506896	0	0.540287	0.188957	0.429952	0.450277	0.253448
1.66887	1.08258	1.36746	1.2725	1.77622	1.28076	0.834434	0.541288	0.683732	0.636251	0.888109	0.64038	0.417217
0.272514	0.586389	0.111176	0	0	0	0.136257	0.293194	0.0555881	0	0	0	0.0681285
